# Supplementary material for: Relationships between Psychoeducational Rehabilitation and Health Outcomes—A Systematic Review Focused on Acute Coronary Syndrome
Source: MDPI journal article supplement (doi:10.3390/jpm11060440), 2021-05-21
Supplement: s1 [file s1]

Table S1. PRISMA 2009 Checklist

| Section/topic                      | #  | Checklist item                                                                                                                                                                                                                                                                                              | Reported on page # |
|------------------------------------|----|-------------------------------------------------------------------------------------------------------------------------------------------------------------------------------------------------------------------------------------------------------------------------------------------------------------|--------------------|
| <b>TITLE</b>                       |    |                                                                                                                                                                                                                                                                                                             |                    |
| Title                              | 1  | Identify the report as a systematic review, meta-analysis, or both.                                                                                                                                                                                                                                         | 1                  |
| <b>ABSTRACT</b>                    |    |                                                                                                                                                                                                                                                                                                             |                    |
| Structured summary                 | 2  | Provide a structured summary including, as applicable: background; objectives; data sources; study eligibility criteria, participants, and interventions; study appraisal and synthesis methods; results; limitations; conclusions and implications of key findings; systematic review registration number. | 1                  |
| <b>INTRODUCTION</b>                |    |                                                                                                                                                                                                                                                                                                             |                    |
| Rationale                          | 3  | Describe the rationale for the review in the context of what is already known.                                                                                                                                                                                                                              | 2                  |
| Objectives                         | 4  | Provide an explicit statement of questions being addressed with reference to participants, interventions, comparisons, outcomes, and study design (PICOS).                                                                                                                                                  | 2,3                |
| <b>METHODS</b>                     |    |                                                                                                                                                                                                                                                                                                             |                    |
| Protocol and registration          | 5  | Indicate if a review protocol exists, if and where it can be accessed (e.g., Web address), and, if available, provide registration information including registration number.                                                                                                                               | 3                  |
| Eligibility criteria               | 6  | Specify study characteristics (e.g., PICOS, length of follow-up) and report characteristics (e.g., years considered, language, publication status) used as criteria for eligibility, giving rationale.                                                                                                      | 6, 7               |
| Information sources                | 7  | Describe all information sources (e.g., databases with dates of coverage, contact with study authors to identify additional studies) in the search and date last searched.                                                                                                                                  | 3                  |
| Search                             | 8  | Present full electronic search strategy for at least one database, including any limits used, such that it could be repeated.                                                                                                                                                                               | 3                  |
| Study selection                    | 9  | State the process for selecting studies (i.e., screening, eligibility, included in systematic review, and, if applicable, included in the meta-analysis).                                                                                                                                                   | 4                  |
| Data collection process            | 10 | Describe method of data extraction from reports (e.g., piloted forms, independently, in duplicate) and any processes for obtaining and confirming data from investigators.                                                                                                                                  | 5                  |
| Data items                         | 11 | List and define all variables for which data were sought (e.g., PICOS, funding sources) and any assumptions and simplifications made.                                                                                                                                                                       | 6, 7               |
| Risk of bias in individual studies | 12 | Describe methods used for assessing risk of bias of individual studies (including specification of whether this was done at the study or outcome level), and how this information is to be used in any data synthesis.                                                                                      | 5, SM (Table S2)   |
| Summary measures                   | 13 | State the principal summary measures (e.g., risk ratio, difference in means).                                                                                                                                                                                                                               | 5                  |
| Synthesis of results               | 14 | Describe the methods of handling data and combining results of studies, if done, including measures of consistency (e.g., $I^2$ ) for each meta-analysis.                                                                                                                                                   | Not applicable     |

| Section/topic                 | #  | Checklist item                                                                                                                                                                                           | Reported on page #    |
|-------------------------------|----|----------------------------------------------------------------------------------------------------------------------------------------------------------------------------------------------------------|-----------------------|
| Risk of bias across studies   | 15 | Specify any assessment of risk of bias that may affect the cumulative evidence (e.g., publication bias, selective reporting within studies).                                                             | 5, SM (Figure S1)     |
| Additional analyses           | 16 | Describe methods of additional analyses (e.g., sensitivity or subgroup analyses, meta-regression), if done, indicating which were pre-specified.                                                         | Not applicable        |
| <b>RESULTS</b>                |    |                                                                                                                                                                                                          |                       |
| Study selection               | 17 | Give numbers of studies screened, assessed for eligibility, and included in the review, with reasons for exclusions at each stage, ideally with a flow diagram.                                          | 5                     |
| Study characteristics         | 18 | For each study, present characteristics for which data were extracted (e.g., study size, PICOS, follow-up period) and provide the citations.                                                             | 6, 7                  |
| Risk of bias within studies   | 19 | Present data on risk of bias of each study and, if available, any outcome level assessment (see item 12).                                                                                                | SM (Table S2)         |
| Results of individual studies | 20 | For all outcomes considered (benefits or harms), present, for each study: (a) simple summary data for each intervention group (b) effect estimates and confidence intervals, ideally with a forest plot. | 8 – 14, SM (Table S3) |
| Synthesis of results          | 21 | Present results of each meta-analysis done, including confidence intervals and measures of consistency.                                                                                                  | Not applicable        |
| Risk of bias across studies   | 22 | Present results of any assessment of risk of bias across studies (see Item 15).                                                                                                                          | SM (Figure S1)        |
| Additional analysis           | 23 | Give results of additional analyses, if done (e.g., sensitivity or subgroup analyses, meta-regression [see Item 16]).                                                                                    | Not applicable        |
| <b>DISCUSSION</b>             |    |                                                                                                                                                                                                          |                       |
| Summary of evidence           | 24 | Summarize the main findings including the strength of evidence for each main outcome; consider their relevance to key groups (e.g., healthcare providers, users, and policy makers).                     | 14, 15                |
| Limitations                   | 25 | Discuss limitations at study and outcome level (e.g., risk of bias), and at review-level (e.g., incomplete retrieval of identified research, reporting bias).                                            | 15                    |
| Conclusions                   | 26 | Provide a general interpretation of the results in the context of other evidence, and implications for future research.                                                                                  | 16                    |
| <b>FUNDING</b>                |    |                                                                                                                                                                                                          |                       |
| Funding                       | 27 | Describe sources of funding for the systematic review and other support (e.g., supply of data); role of funders for the systematic review.                                                               | 16                    |

**Table S2.** Methodological quality summary: review authors' judgements about each methodological quality item for each included study

|                    | Random sequence generation (selection bias) | Allocation concealment (selection bias) | Selective reporting (reporting bias) | Were groups balanced at baseline? (other source of bias) | Intention to treat analysis (other source of bias) | Did both groups receive comparable care (other source of bias) | Blinding -participants and personnel (performance bias) | Blinding outcome assessment (detection bias) | Incomplete outcome data (attrition bias) |
|--------------------|---------------------------------------------|-----------------------------------------|--------------------------------------|----------------------------------------------------------|----------------------------------------------------|----------------------------------------------------------------|---------------------------------------------------------|----------------------------------------------|------------------------------------------|
| Chiavarino 2017    | ?                                           | +                                       | +                                    | -                                                        | +                                                  | -                                                              | +                                                       | +                                            | +                                        |
| Davidson 2010      | +                                           | +                                       | +                                    | +                                                        | +                                                  | +                                                              | -                                                       | -                                            | +                                        |
| Fernandes 2017     | +                                           | ?                                       | +                                    | -                                                        | +                                                  | -                                                              | +                                                       | +                                            | -                                        |
| Huffman 2019       | +                                           | -                                       | +                                    | +                                                        | +                                                  | +                                                              | +                                                       | ?                                            | +                                        |
| Nasiri 2020        | +                                           | -                                       | +                                    | +                                                        | +                                                  | -                                                              | +                                                       | +                                            | ?                                        |
| Norlund 2018       | +                                           | +                                       | +                                    | +                                                        | -                                                  | +                                                              | +                                                       | -                                            | +                                        |
| O'Brien 2014       | +                                           | +                                       | +                                    | +                                                        | -                                                  | ?                                                              | +                                                       | +                                            | +                                        |
| O'Neil 2015        | +                                           | +                                       | +                                    | +                                                        | -                                                  | +                                                              | +                                                       | -                                            | +                                        |
| Oranta et al. 2010 | +                                           | ?                                       | +                                    | +                                                        | +                                                  | -                                                              | +                                                       | +                                            | ?                                        |
| Roncella 2013      | ?                                           | +                                       | +                                    | +                                                        | -                                                  | +                                                              | +                                                       | +                                            | +                                        |
| Sunamura 2017      | +                                           | +                                       | -                                    | +                                                        | ?                                                  | +                                                              | +                                                       | +                                            | +                                        |

**Figure S1.** Risk of bias across studies, N = 11

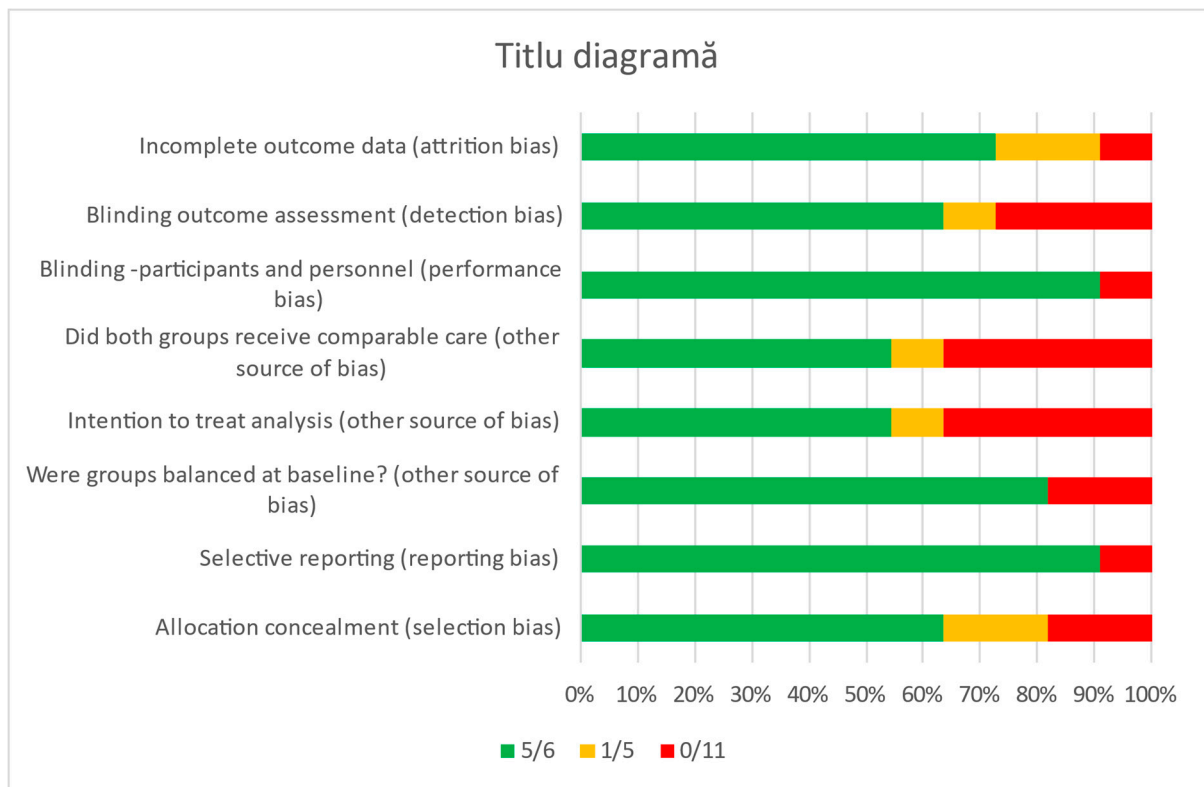

**Table S3.** Outcomes summary of outcomes for each included study

| Outcome                      | Measure                                          | P value             | Effect size at maxim follow-up |
|------------------------------|--------------------------------------------------|---------------------|--------------------------------|
| <b>CHIVARINO et al. 2016</b> |                                                  |                     |                                |
| Quality of life              | World Health Organization Quality of Life Brief: |                     |                                |
|                              | total score                                      | <b>p &lt; 0.001</b> | F(1, 52): 14.8                 |
|                              | physical health                                  | <b>p &lt; 0.001</b> | F(1, 52): 13.3                 |
|                              | psychological health                             | <b>p &lt; 0.001</b> | F(1, 52): 12.3                 |
|                              | social relationships                             | <b>p &lt; 0.001</b> | F(1, 52): 13.7                 |
|                              | environment                                      | <b>p = 0.026</b>    | F(1, 52): 5.2                  |
| Medical variable             | Systolic blood pressure                          | <b>p = 0.019</b>    | F(1, 58): 5.8                  |
|                              | Diastolic blood pressure                         | p > 0.265           | All F < 1.3                    |
|                              | Low-density lipoprotein cholesterol              | <b>p &lt; 0.001</b> | F(1, 43): 18.2                 |
|                              | High-density lipoprotein cholesterol             | <b>p &lt; 0.001</b> | F(1, 43): 28.5                 |
|                              | Triglycerides                                    | <b>p = 0.047</b>    | F(1, 44): 4.2                  |
|                              | Glycemia                                         | p > 0.123           | All F < 2.5                    |
|                              | Creatinine                                       | <b>p = 0.002</b>    | F(1, 46): 10.3                 |
|                              | Body mass index                                  | p > 0.164           | All F < 2.0                    |
|                              | Heart rate                                       | <b>p = 0.023</b>    | F(1, 56): 5.5                  |
|                              | Ventricular ejection fraction                    | <b>p = 0.021</b>    | F(1, 57): 5.7                  |

|                                              |                                                                    |                                |                                        |
|----------------------------------------------|--------------------------------------------------------------------|--------------------------------|----------------------------------------|
| Psychological variables                      |                                                                    |                                |                                        |
| Coping strategies                            | Brief Coping Orientations to Problems Experienced:                 |                                |                                        |
|                                              | total score                                                        | p = 0.027                      | F(1, 59): 5.2                          |
|                                              | emotion-focused subscale                                           | p = 0.001                      | F(1, 59): 12.3                         |
|                                              | problem-focused subscale                                           | p = 0.002                      | F(1, 59): 10.2                         |
|                                              | dysfunctional coping subscale                                      | p > 0.759                      | All F < 0.1                            |
|                                              | Twenty-Item Toronto Alexithymia Scale:                             |                                |                                        |
|                                              | total score                                                        | p = 0.035                      | F(1, 58): 4.6                          |
|                                              | externally oriented thinking subscale                              | p = 0.003                      | F(1, 58): 9.3                          |
|                                              | difficulty identifying feelings subscale                           | p > 0.166                      | all F < 2.0                            |
|                                              | Self-esteem                                                        | difficulty describing feelings | p > 0.166                              |
| Health locus of control                      | subscale                                                           | p > 0.652                      | all F < 0.2                            |
|                                              | General Self-Efficacy Scale                                        | p = 0.002                      | F(1, 29): 11.7                         |
|                                              | Multidimensional Health Locus of Control Scale                     |                                |                                        |
| Behavioral variables                         | Smoking stopp                                                      | p = 0.361                      | NS                                     |
|                                              | Physical exercise continued                                        | p = 0.001                      |                                        |
| DAVIDSON et a. 2010                          |                                                                    |                                |                                        |
| Patients satisfaction about the intervention | Patients reporting depression care as excellent or very good       | p < 0.001                      | OR (95% CI): 5.4 (2.2- 12.9)           |
| MACE events                                  |                                                                    | p = 0.047                      | NS                                     |
| Depression                                   | Beck Depression Inventory                                          | p = 0.005                      | OR (95% CI): 0.59 (0.18- 1.00)         |
| FERNANDES et al. 2017                        |                                                                    |                                |                                        |
| Emotional state                              | Portuguese versions of the Hospital Anxiety and Depression Scale:  |                                |                                        |
|                                              | total score                                                        | p < 0.001                      | M(SD): 5.520 (0.635) vs 28.092 (0.690) |
|                                              | anxiety                                                            | p < 0.001                      | M(SD): 2.847 (0.339) vs 12.017 (0.367) |
|                                              | depression                                                         | p < 0.001                      | M(SD): 2.623 (0.374 vs 16.134 (0.406)  |
| Illness cognitions                           | Portuguese versions of the Brief Illness Perception Questionnaire: |                                | M(SD):                                 |
|                                              | Consequences                                                       | p < 0.001                      | 1.892 (0.060) vs 3.643 (0.065)         |
|                                              | Timeline                                                           | p < 0.001                      | 1.937 (0.070) vs 3.429 (0.075)         |
|                                              | Personal control                                                   | p < 0.001                      | 2.860 (0.094) vs 0.617 (0.102)         |
|                                              | Treatment control                                                  | p < 0.001                      | 3.148 (0.107) vs 2.221 (0.116)         |
|                                              | Identity                                                           | p < 0.001                      | 0.399 (0.092) vs 0.912 (0.100)         |
|                                              | Concern                                                            | p < 0.001                      | 1.757 (0.085) vs 3.550 (0.091)         |
|                                              | Comprehensibility                                                  | p < 0.001                      | 3.394 (0.100) vs 0.728 (0.107)         |
|                                              | Emotions                                                           | p < 0.001                      | 1.493 (0.093) vs 3.499 (0.101)         |
| FERNANDES et al. 2018                        |                                                                    |                                |                                        |

|                                |                                                                                                                                                 |                     |                                                                       |
|--------------------------------|-------------------------------------------------------------------------------------------------------------------------------------------------|---------------------|-----------------------------------------------------------------------|
| Knowledge about ACS            | Portuguese versions of the Knowledge Questionnaire                                                                                              | <b>p = 0.000</b>    | M(SD): 15.70 (0.342) vs 2.92 (0.370)                                  |
| <b>NASIRI et al. 2010</b>      |                                                                                                                                                 |                     |                                                                       |
| Perceived stress               | Perceived Stress Scale-14                                                                                                                       | <b>p &lt; 0.001</b> | M(SD) = 23.03 (7.79) vs 33.75 (3.78)                                  |
| Brief illness perception       | Brief Illness Perception Questionnaire                                                                                                          | <b>p &lt; 0.001</b> |                                                                       |
| <b>NORLUND et al. 2018</b>     |                                                                                                                                                 |                     |                                                                       |
| Depression/anxiety             | Hospital Anxiety and Depression scale: total score                                                                                              | p = 0.53            | ES (95% CI): -0.47 (-1.95 to 1.00)                                    |
|                                | anxiety subscale                                                                                                                                | p = 0.82            | ES (95% CI): -0.09 (-0.91 to 0.72)                                    |
|                                | depression subscale                                                                                                                             | p = 0.32            | ES (95% CI): -0.45 (-1.34 to 0.44)                                    |
|                                | Montgomery-Åsberg Depression Rating Scale-Self rating                                                                                           | p = 0.48            | ES (95% CI): -0.58 (-2.20 to 1.04)                                    |
|                                | The Behavioral Activation for Depression Scale-Short Form                                                                                       | p = 0.58            | ES (95% CI): -0.50 (-2.31 to 1.30)                                    |
| Cardiac Anxiety                | Cardiac Anxiety Questionnaire                                                                                                                   | p = 0.50            | ES (95% CI): -0.73 (-2.83 to 1.38)                                    |
| <b>O'BRIEN et al. 2014</b>     |                                                                                                                                                 |                     |                                                                       |
| Knowledge about ACS symptoms   | Dichotomous scale (26 items):<br>5 items assessed knowledge of ACS facts (true/false)<br>21 items measured recognition of ACS symptoms (yes/no) | <b>p &lt; 0.001</b> | NS<br><br>F (2,1111): 12.750                                          |
| Attitude                       | Attitude scale (5 items)                                                                                                                        | <b>p = 0.003</b>    | F (2,1111): 5.111                                                     |
| Belief                         | Beliefs scale (9 items)                                                                                                                         | <b>p &lt; 0.001</b> | M(SD)(95%CI): 2.22 (4.30)( -2.57 -1.87) vs -1.32 (3.77)(-1.32 - 1.64) |
| <b>O'NEIL et al. 2015</b>      |                                                                                                                                                 |                     |                                                                       |
| Depression                     | Cardiac Depression Scale                                                                                                                        | p = 0.558           | ES (95% CI): 3.06 (-7.8 to 4.3)                                       |
|                                | Patient Health Questionnaire 9                                                                                                                  | <b>p = 0.025</b>    | ES (95% CI): 0.81 (-0.2 to -3.4)                                      |
| Quality of life                | SF-12 Physical component score                                                                                                                  | p = 0.117           | ES (95% CI): 1.42 (-0.6 to 5.1)                                       |
|                                | SF-12 Mental component score                                                                                                                    | p = 0.070           | ES (95% CI): 1.74 (-0.3 to 6.6)                                       |
| <b>SUNAMURA et al. 2017</b>    |                                                                                                                                                 |                     |                                                                       |
| The 10-year CVD mortality risk | SCORE Risk Score                                                                                                                                | p = 0.48            | ES: 3.30% (25%–75% IQR, 1.01–5.59) vs 3.47% (25%–75% IQR, 0.86– 6.28) |
| Quality of life                | MacNew Questionnaire: Emotional scale                                                                                                           | <b>p = 0.004</b>    | NS                                                                    |
|                                | Physical scale                                                                                                                                  | <b>p = 0.015</b>    |                                                                       |

|                                                 |                                                                                          |                     |                                                         |
|-------------------------------------------------|------------------------------------------------------------------------------------------|---------------------|---------------------------------------------------------|
| Anxiety                                         | Anxiety Score                                                                            | <b>p = 0.036</b>    | NS                                                      |
| Cardiovascular risk factors                     | Smoking                                                                                  | <b>p &lt; 0.001</b> | ES: 13.4% vs 21.3%                                      |
|                                                 | Total cholesterol (mmol/L)                                                               | <b>p &lt; 0.001</b> | ES: 3.9 vs 4.3 mmol/L                                   |
|                                                 | Systolic blood pressure (mmHg)                                                           | p > 0.05            |                                                         |
|                                                 | Waist circumference (cm)                                                                 | p > 0.05            |                                                         |
| <b>TER HOEVE et al. 2018</b>                    |                                                                                          |                     |                                                         |
| Physical behavior                               | Step count (nr of steps per min of wear time)                                            | <b>p = 0.035</b>    | ES (95% CI): 0.45 (0.03 to 0.86)                        |
|                                                 | Time in prolonged moderate-to-vigorous physical activity                                 | <b>p = 0.002</b>    | ES (95% CI): 1.77 (1.20 to 2.60)                        |
| <b>ORANTA et al. 2010</b>                       |                                                                                          |                     |                                                         |
| Depression                                      | Beck Depression Inventory                                                                | <b>p = 0.009</b>    | OR (95% CI): 0.31 (0.16 to 0.61) vs 1.15 (0.60 to 0.22) |
| Distress                                        | Symptom Checklist-25                                                                     | p = 0.299           | OR (95% CI): 0.42 (0.21–0.84) vs 0.90 (0.43–1.86)       |
| <b>ORANTA et al. 2011</b>                       |                                                                                          |                     |                                                         |
| Quality of life                                 | EuroQol-5D questionnaires                                                                |                     |                                                         |
|                                                 | Mobility                                                                                 | p = 0.33            | NS                                                      |
|                                                 | Self-Care                                                                                | p = 0.77            |                                                         |
|                                                 | Anxiety/Depression                                                                       | p = 0.99            |                                                         |
| <b>ORANTA 2012</b>                              |                                                                                          |                     |                                                         |
| Use of Healthcare Services                      | Any specialized healthcare service                                                       | <b>p = 0.007</b>    | NS                                                      |
| <b>HUFFMAN et al. 2019</b>                      |                                                                                          |                     |                                                         |
| Physical behavior                               | Moderate to vigorous physical activity (Accelerometer)                                   | <b>p = 0.026</b>    | EMD: 15.08; ES: 6.75                                    |
|                                                 | Number of steps                                                                          | p = 0.14            | EMD: 1617; ES: 1081                                     |
| Positive affect                                 | Positive and Negative Affect Schedule                                                    | <b>p &lt; 0.001</b> | EMD: 7.34; SE: 2.16                                     |
| Quality of life                                 | SF-12 Physical component score                                                           | p = 0.55            | EMD: 4.29; SE: 2.24                                     |
|                                                 | SF-12 Mental component score                                                             | p = 0.80            | EMD: 4.44; SE: 2.54                                     |
| Health behavior                                 | Self-reported health behavior adherence (Medical Outcomes StudySpecific Adherence Scale) | p = 0.22            | EMD: 8.91; SE: 3.58                                     |
| <b>RONCELLA et al. 2013</b>                     |                                                                                          |                     |                                                         |
| Combined incidence of new cardiovascular events |                                                                                          | <b>p = 0.0006</b>   | I (%) (N): 21/49 (43%) (33) vs 35/45 (78%) (78)         |

|                                                 |                                                  |                      |                                                                                  |
|-------------------------------------------------|--------------------------------------------------|----------------------|----------------------------------------------------------------------------------|
| Cardiovascular events                           | Reinfarction                                     | p = 0.67             | I (%) (N) for recurrence of typical angina: 14/49 (29%) (14) vs 22/45 (49%) (23) |
|                                                 | Death                                            |                      |                                                                                  |
|                                                 | Stroke                                           |                      |                                                                                  |
|                                                 | Revascularization                                | p = 0.33             |                                                                                  |
|                                                 | Major adverse cardiac and cerebrovascular events | p = 0.24             |                                                                                  |
|                                                 | Life-threatening ventricular arrhythmia          | p = 0.23             |                                                                                  |
|                                                 | Recurrence of typical angina                     | <b>p = 0.04</b>      |                                                                                  |
| New non-cardiovascular events                   |                                                  | <b>p &lt; 0.0001</b> | I (%) (N): 5/49 (10%) (5) vs 25/45 (56%) (37)                                    |
| Re-hospitalizations                             | Total                                            | <b>p = 0.02</b>      | M(95% CI): 0.77 (0.53–0.98) vs 1.2 (0.92–1.57)                                   |
|                                                 | Cardiovascular                                   | P = 0.14             | M(95% CI): 0.69 (0.48–0.90) vs 1.0 (0.71–1.38)                                   |
|                                                 | Non-Cardiovascular                               | P = 0.25             | M(95% CI): 0.08 (0.002–0.16) vs 0.2 (0.05–0.35)                                  |
| NYHA class                                      | NYHA class ≥2                                    | <b>p = 0.01</b>      | I (%): 1/49 (2%) vs 8/45 (18%)                                                   |
| Distress                                        | Self-evaluation test                             | p = 0.85             | ES(IQR): 5 (3 to 8) vs 5 (3 to 7)                                                |
|                                                 | Assessing global psychological distress          |                      |                                                                                  |
| Vital exhaustion                                | Maastricht Questionnaire                         | p = 0.32             | M(SD): 56.5 (8.1) vs 59.7 (14.5)                                                 |
| Depression                                      | Beck Depression Inventory                        | <b>p = 0.03</b>      | ES(IQR): 6 (3 to 8) vs 8 (5 to 14)                                               |
| Quality of life                                 | MacNew Questionnaire: Global Score               | p = 0.07             | ES(IQR): 6.07 (5.48 to 6.39) vs 5.67 (4.89 to 6.31)                              |
|                                                 | MacNew Questionnaire: Emotional Score            | p = 0.38             | ES(IQR): 5.79 (5.36 to 6.35) vs 5.79 (5.0 to 6.32)                               |
|                                                 | MacNew Questionnaire: Physical Score             | <b>p = 0.03</b>      | ES(IQR): 6.23 (5.70 to 6.53) vs 5.69 (4.85 to 6.29)                              |
|                                                 | MacNew Questionnaire: Social Score               | p = 0.06             | ES(IQR): 6.15 (5.69 to 6.61) vs 5.86 (5.0 to 6.46)                               |
| <b>PRISTIPINO et al. 2019</b>                   |                                                  |                      |                                                                                  |
| Combined incidence of new cardiovascular events |                                                  | p = 0.929            | I (%) (N): 13/40 (33%) (21) vs 13/36 (36%) (22)                                  |

|                               |                                                  |                  |                                                                                                              |
|-------------------------------|--------------------------------------------------|------------------|--------------------------------------------------------------------------------------------------------------|
| Cardiovascular events         | Reinfarction                                     | p = 1.00         | I (%) (N) for recurrence of typical angina: 2/40 (5%) (2) vs 6/36 (17%) (6)                                  |
|                               | Death                                            | p = 1.00         |                                                                                                              |
|                               | Stroke                                           | -                |                                                                                                              |
|                               | Revascularization                                | p = 1.00         |                                                                                                              |
|                               | Major adverse cardiac and cerebrovascular events | p = 1.00         |                                                                                                              |
|                               | Life-threatening ventricular arrhythmia          | p = 1.00         |                                                                                                              |
|                               | Recurrence of typical angina                     | p = 0.20         |                                                                                                              |
| New non-cardiovascular events |                                                  | p = 1.00         | I (%) (N): 11/40 (28%) (15) vs 9/36 (25%) (15)                                                               |
| Re-hospitalizations           | Total                                            | p = 0.968        | Events x 100 patient-year (95% CI) for total re-hospitalizations: 48.0 (38.4 to 57.6) vs 57.4 (45.3 to 69.5) |
|                               | Cardiovascular                                   | p = 1.00         |                                                                                                              |
|                               | Non-Cardiovascular                               | p = 1.00         |                                                                                                              |
| NYHA class                    | NYHA class $\geq 2$                              | <b>p = 0.018</b> | I (%): 0/43 (4%) vs 6/36 (17%)                                                                               |

MACE = major adverse cardiovascular event; ACS = acute coronary syndrome; CVD = cardiovascular disease; SF-12 = 12-item short form survey; NS = not specified; OR = odds ratio; CI = confidence interval of the difference; M = Mean; SD = standard deviation; ES = effect size; IQR = Interquartile range; EMD = estimated mean difference; I = Incident proportion; N = Nr. of events
